# Supplementary material for: Evaluation of the Cytotoxic, Antioxidative and Antimicrobial Effects of Dracocephalum moldavica L. Cultivars
Source: MDPI journal article supplement (doi:10.3390/molecules28041604), 2023-02-07
Supplement: s1 [file s1]

# Evaluation of the Cytotoxic, Antioxidative, and Antimicrobial Effects of *Dracocephalum moldavica* L. Cultivars

Ștefania Simea <sup>1</sup>, Irina Ielciu <sup>2,\*</sup>, Daniela Hanganu <sup>3,\*</sup>, Mihaela Niculae <sup>4</sup>, Eموke Pall <sup>4</sup>, Ramona Flavia Burtescu <sup>5</sup>, Neli-Kinga Olah <sup>5,6</sup>, Mihai Cenariu <sup>4</sup>, Ilioara Oniga <sup>3</sup>, Daniela Benedec <sup>3</sup>, and Marcel Duda <sup>1</sup>

<sup>1</sup> Department of Crop Science, Faculty of Agriculture, University of Agricultural Sciences and Veterinary Medicine Cluj-Napoca, 400372 Cluj-Napoca, Romania

<sup>2</sup> Department of Pharmaceutical Botany, Faculty of Pharmacy, “Iuliu Hațieganu” University of Medicine and Pharmacy Cluj-Napoca, 400010 Cluj-Napoca, Romania

<sup>3</sup> Department of Pharmacognosy, Faculty of Pharmacy, University of Medicine and Pharmacy “Iuliu Hațieganu”, 400000 Cluj-Napoca, Romania

<sup>4</sup> Department of Clinical Sciences, University of Agricultural Sciences and Veterinary Medicine Cluj-Napoca, 400374 Cluj-Napoca, Romania

<sup>5</sup> SC PlantExtrakt SRL, 407059 Rădaia, Cluj, Romania

<sup>6</sup> Department of Therapeutical Chemistry, Pharmaceutical Industry and Biotechnologies, Faculty of Pharmacy, Vasile Goldiș Western University from Arad, 310048 Arad, Romania

\* Correspondence: dhanganu@umfcluj.ro (D.H.); irina.ielciu@umfcluj.ro (I.I.)

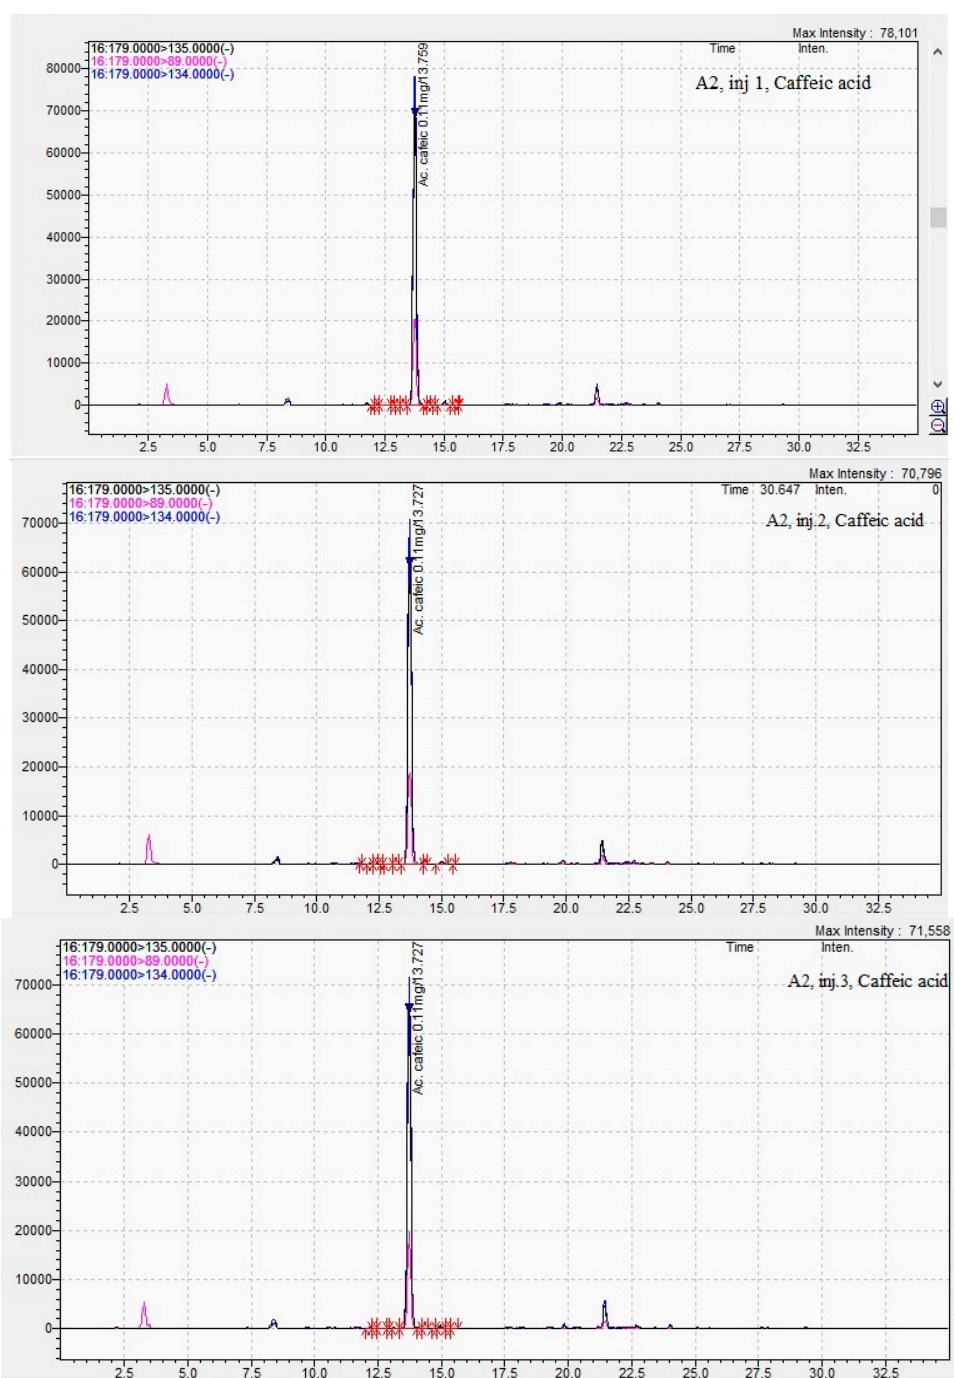

**Figure S1.** LC-MS chromatograms obtained for the identification of caffeic acid in the A2 sample (3 injections).

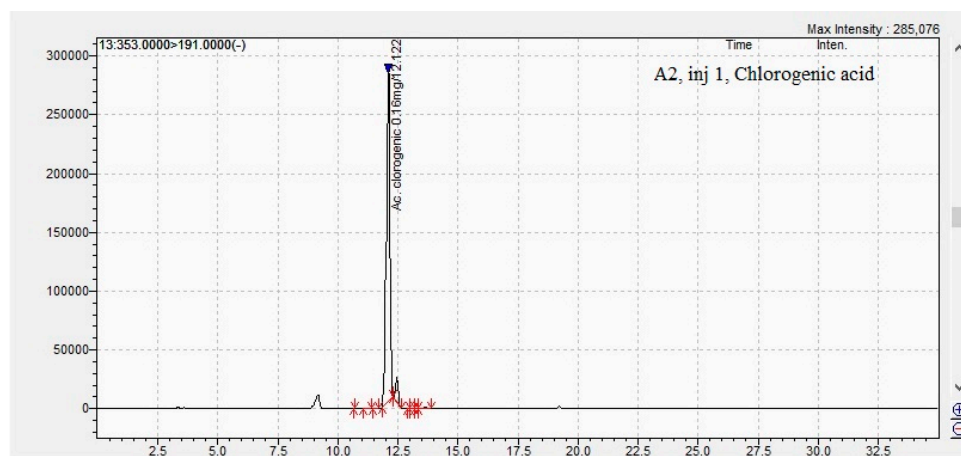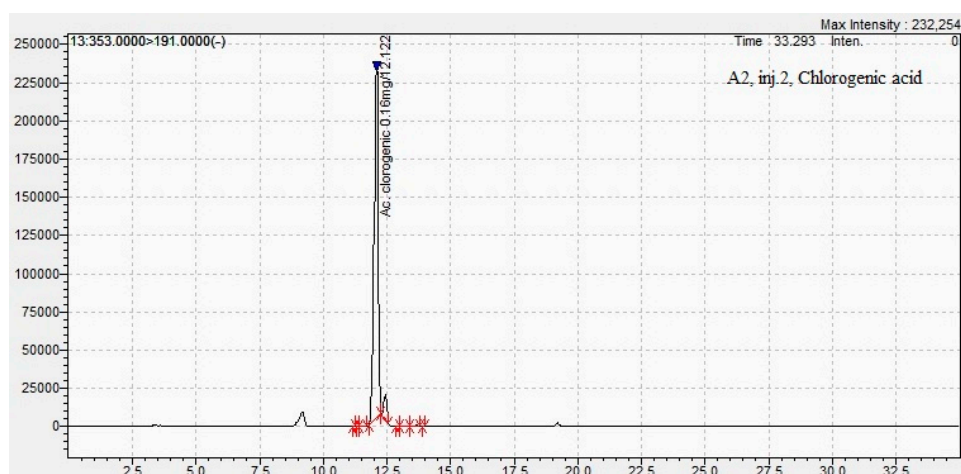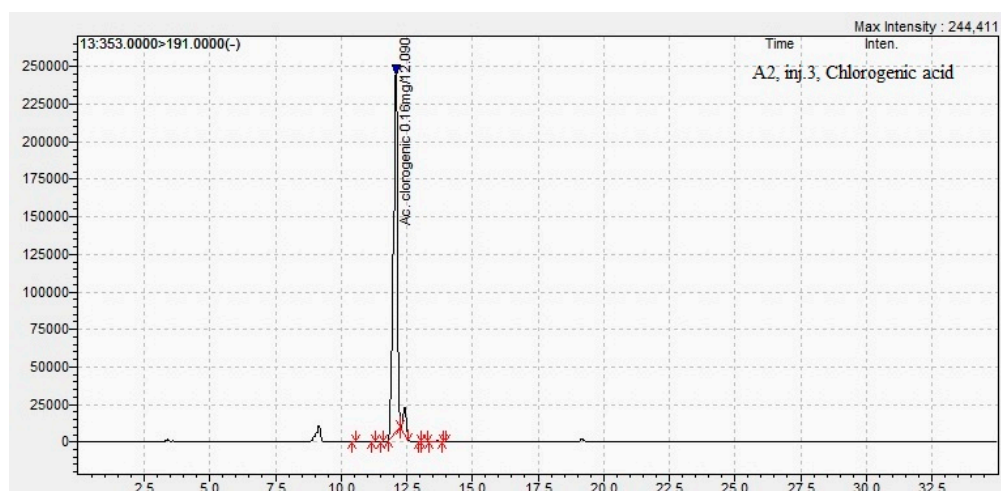

**Figure S2.** LC-MS chromatograms obtained for the identification of chlorogenic acid in the A2 sample (3 injections).

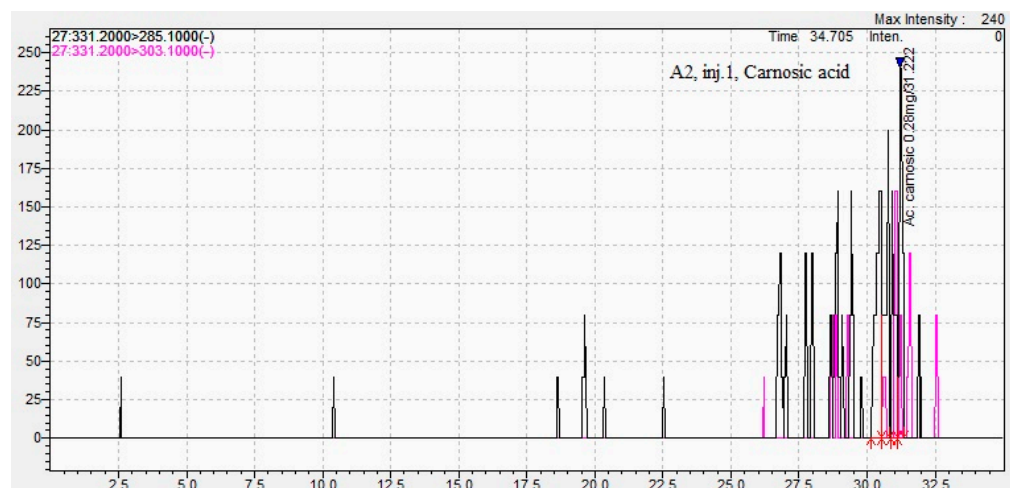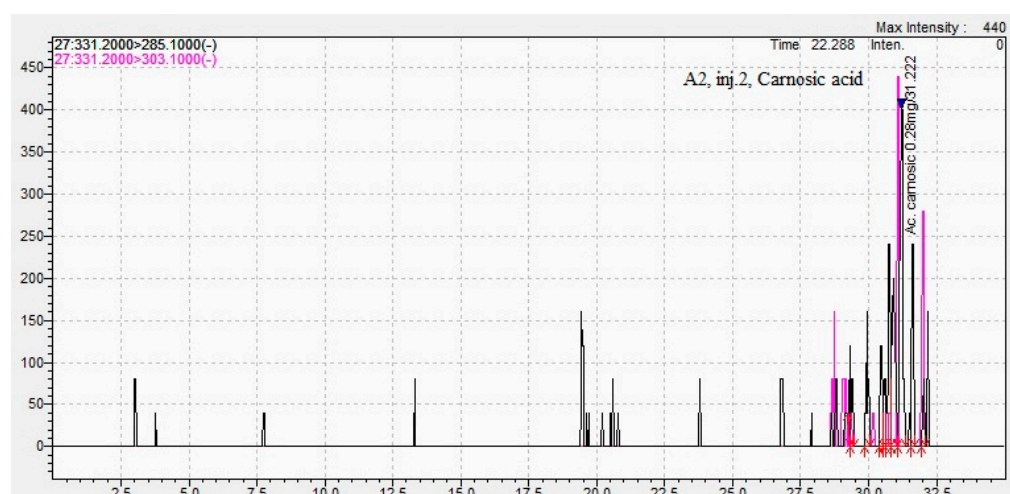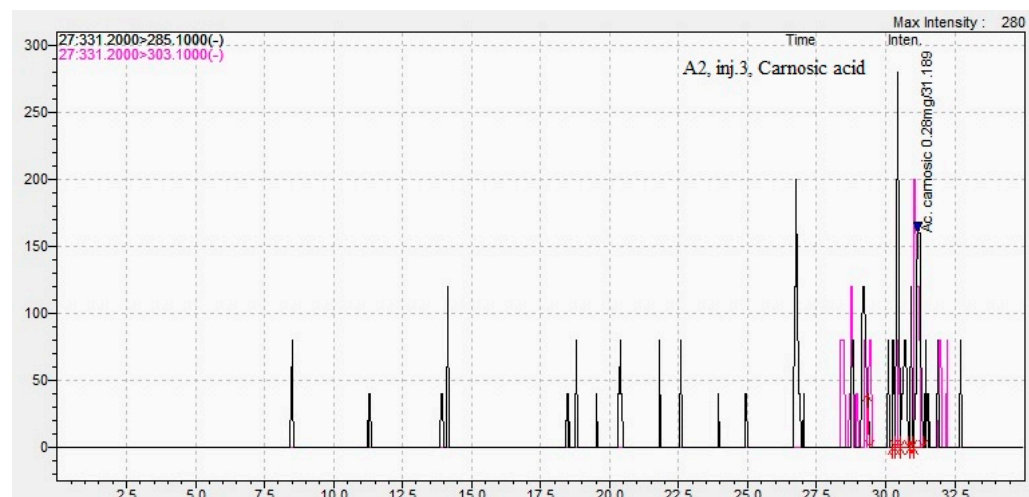

**Figure S3.** LC-MS chromatograms obtained for the identification of carnosic acid in the A2 sample (3 injections).

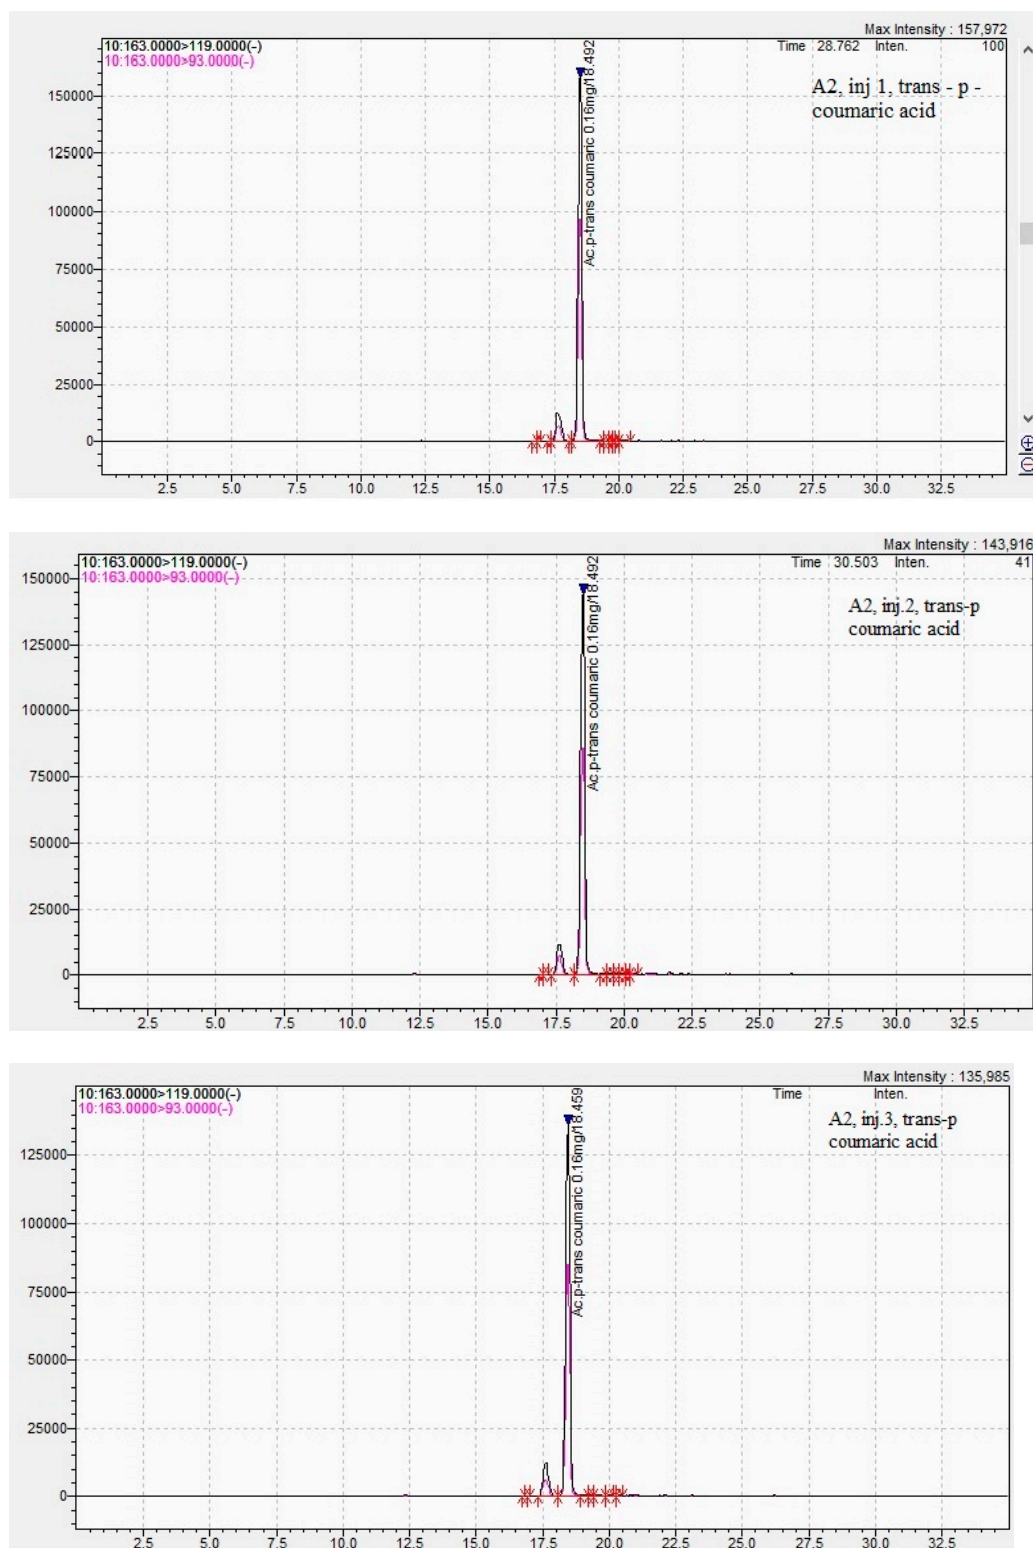

**Figure S4.** LC-MS chromatograms obtained for the identification of trans-*p*-coumaric acid in the A2 sample (3 injections).



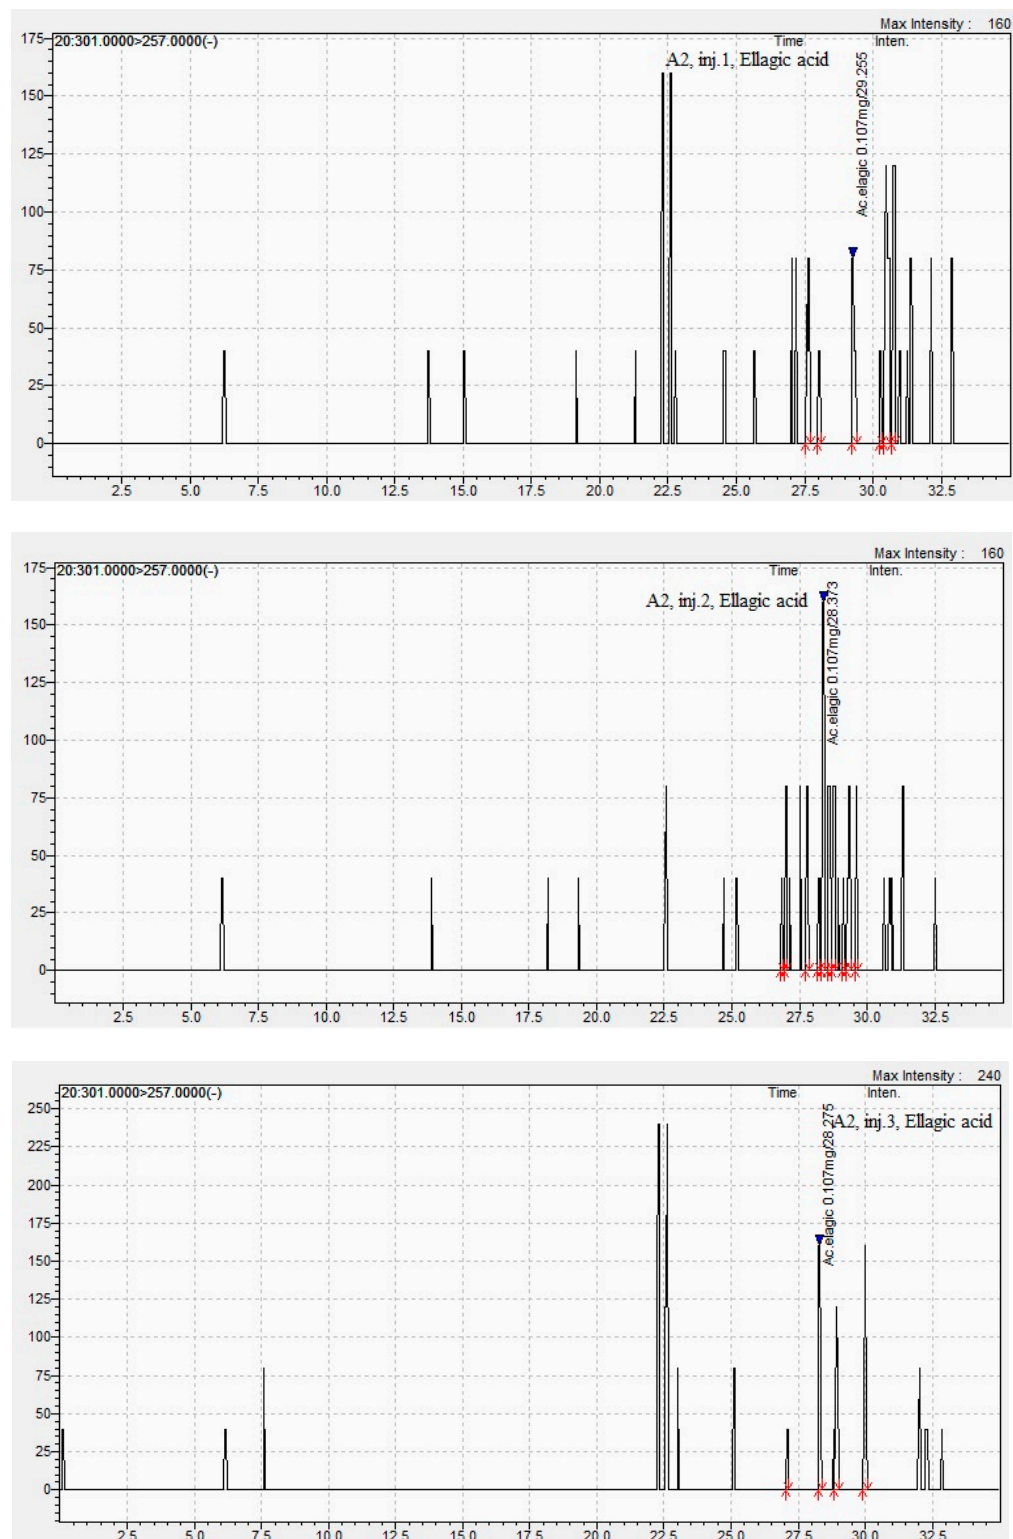

**Figure S5.** LC-MS chromatograms obtained for the identification of ellagic acid in the A2 sample (3 injections).

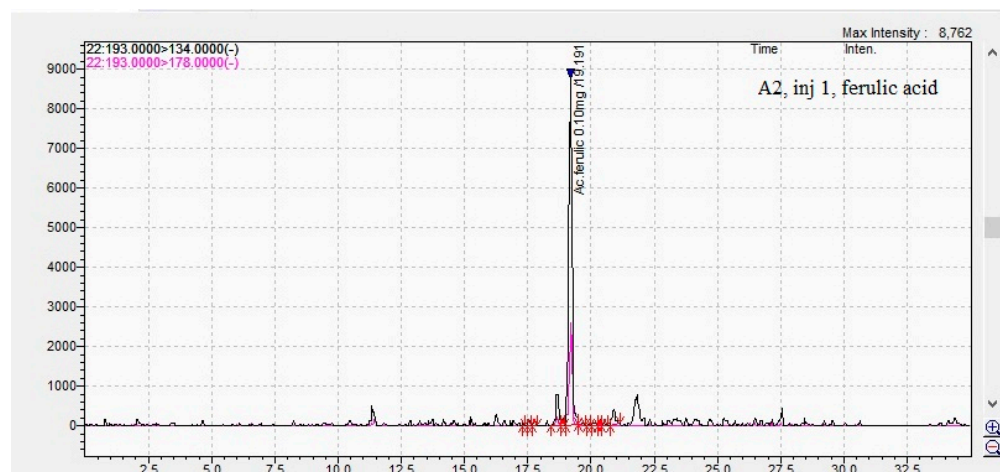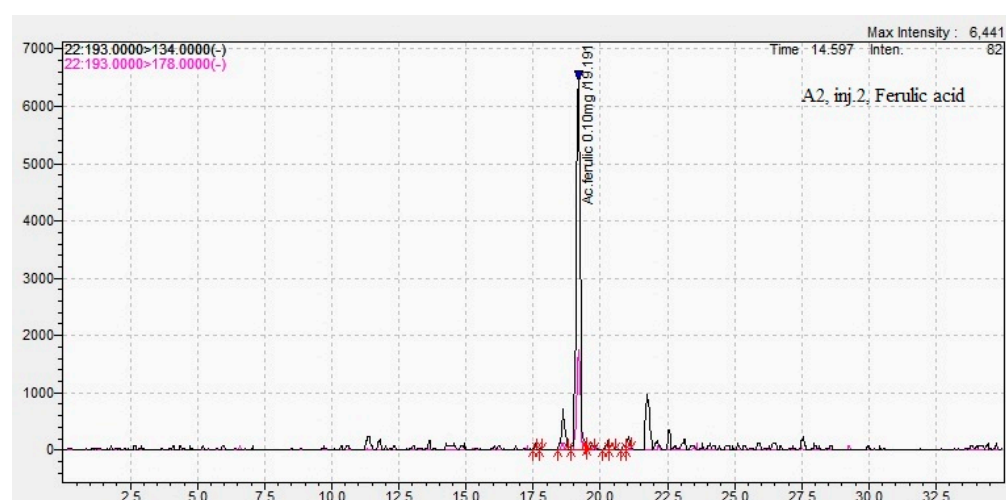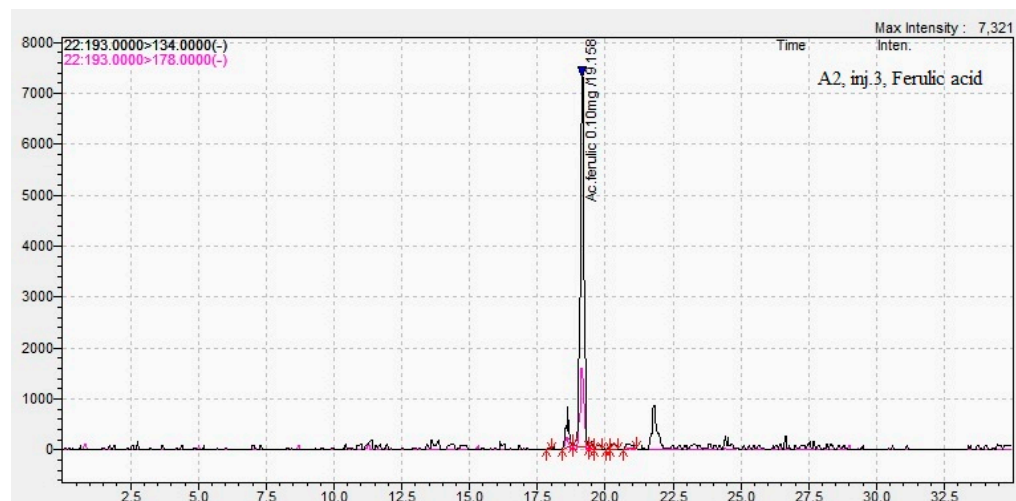

**Figure S6.** LC-MS chromatograms obtained for the identification of ferulic acid in the A2 sample (3 injections).

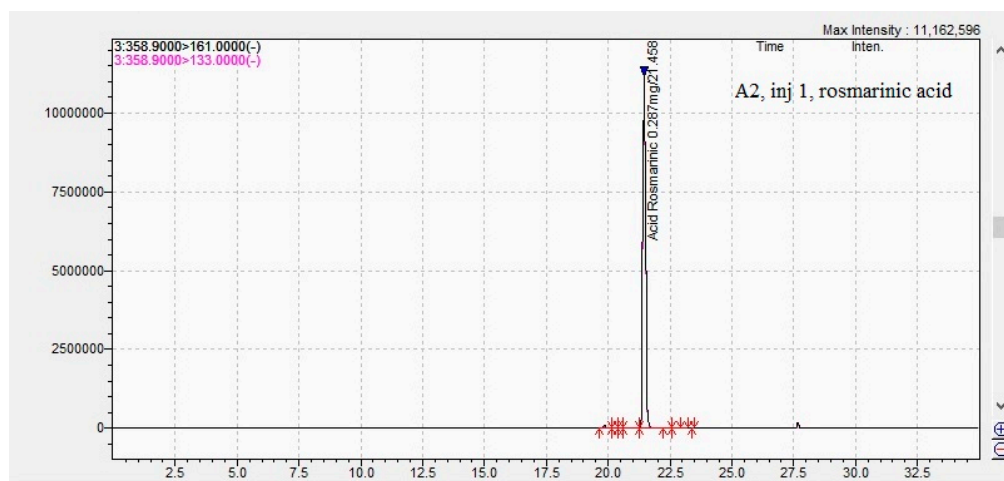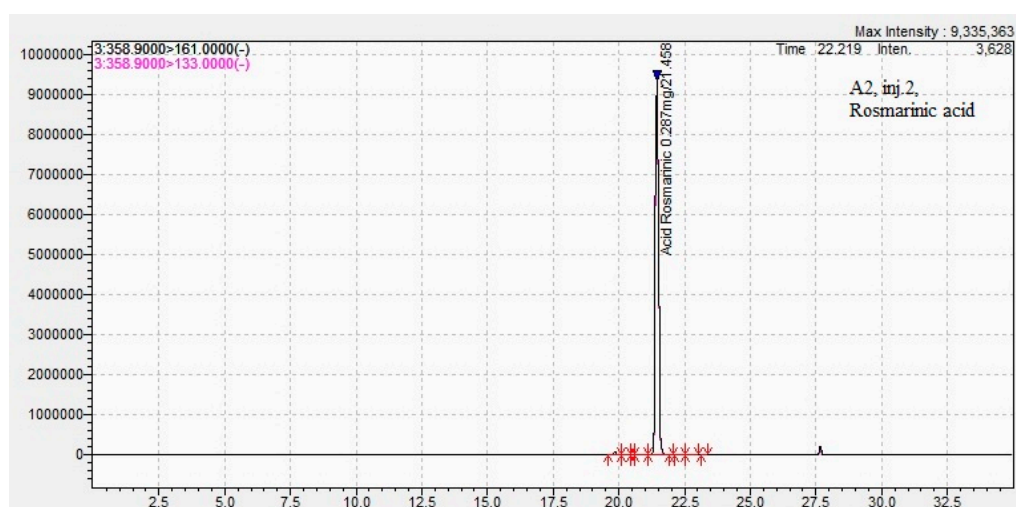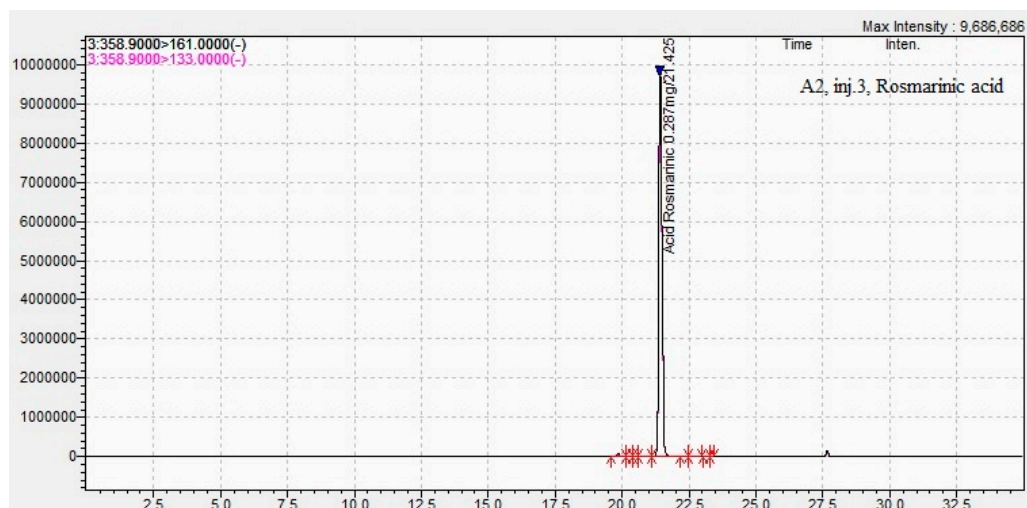

**Figure S7.** LC-MS chromatograms obtained for the identification of rosmarinic acid in the A2 sample (3 injections).



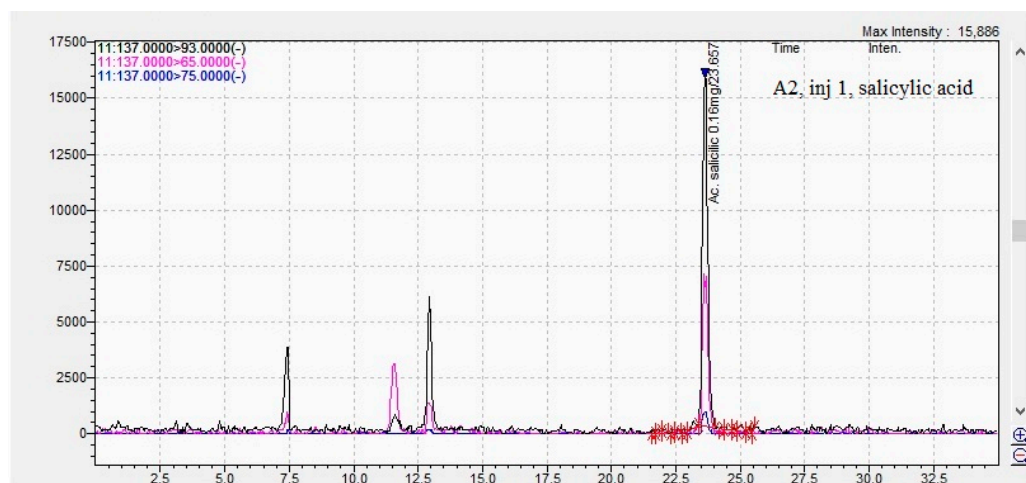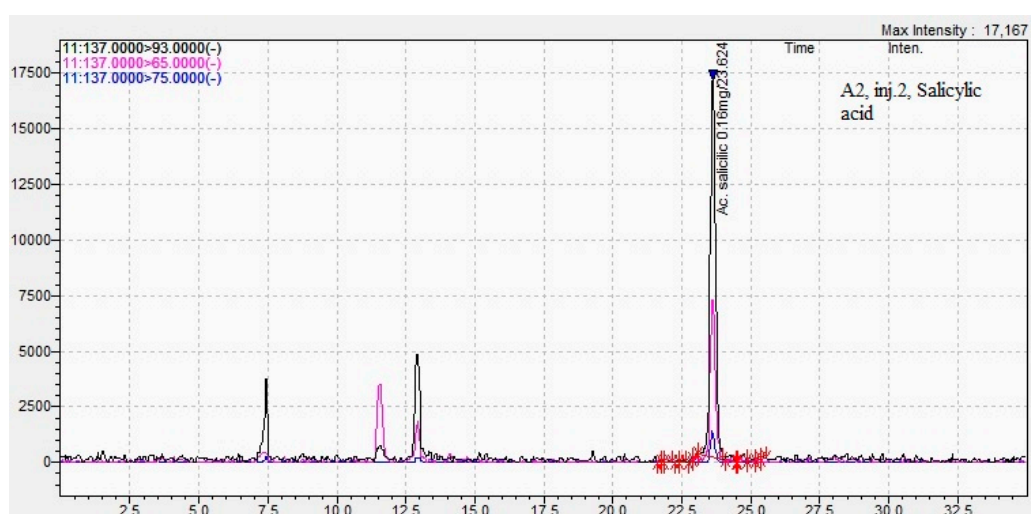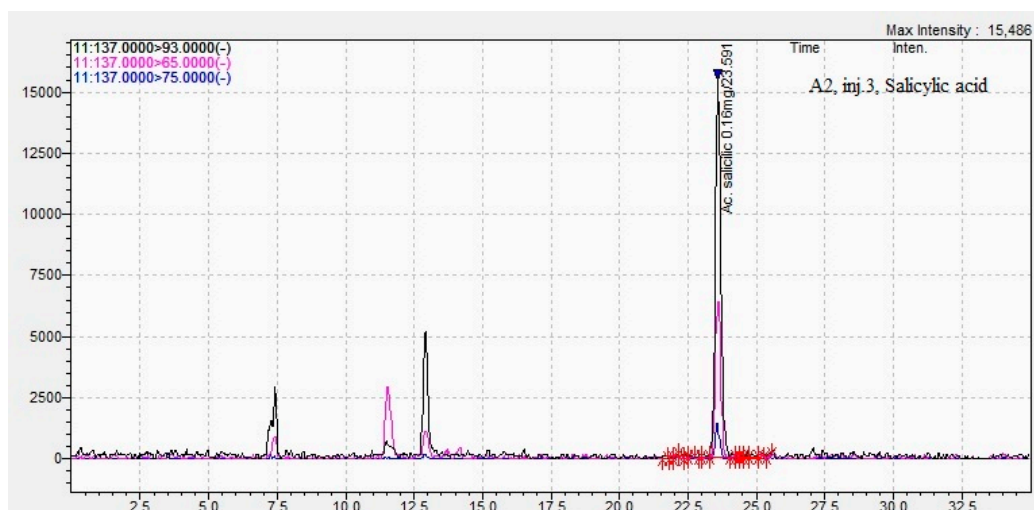

**Figure S8.** LC-MS chromatograms obtained for the identification of salicylic acid in the A2 sample (3 injections).

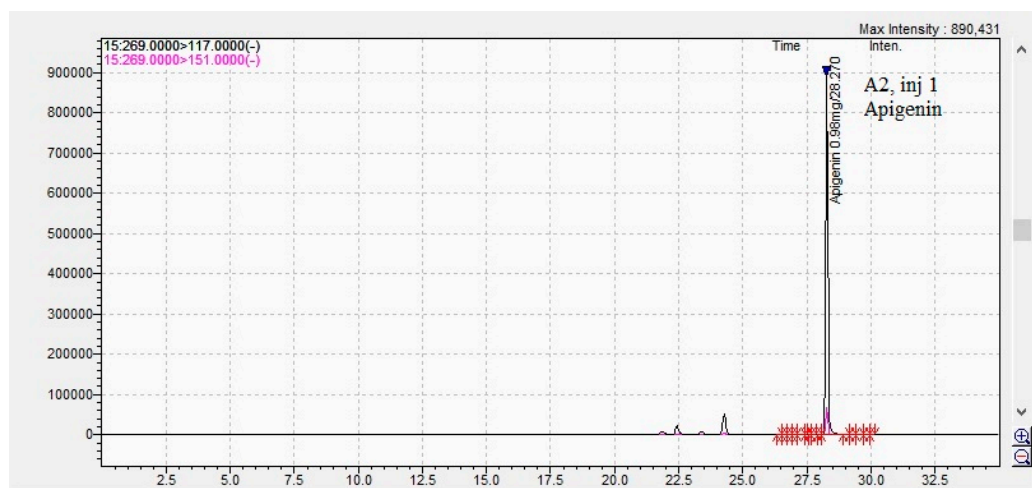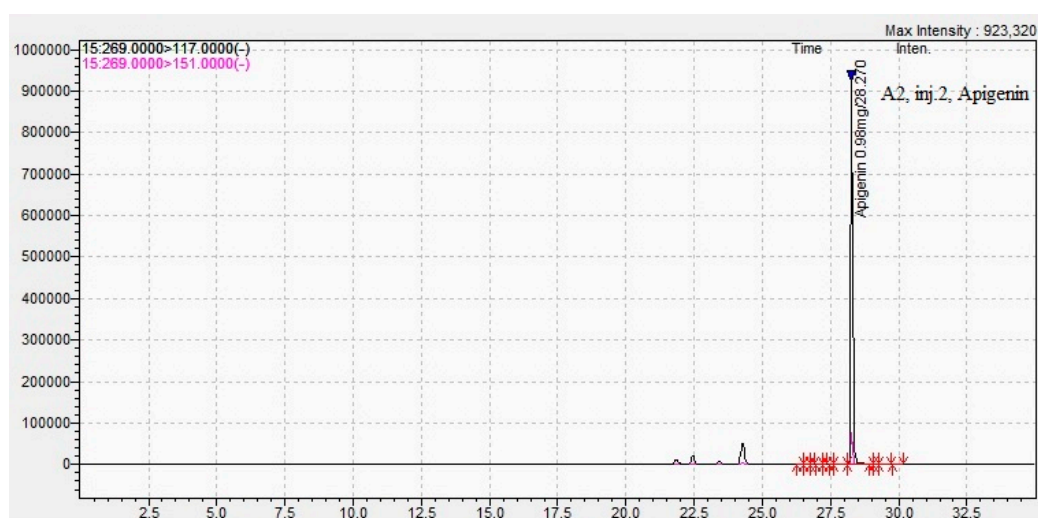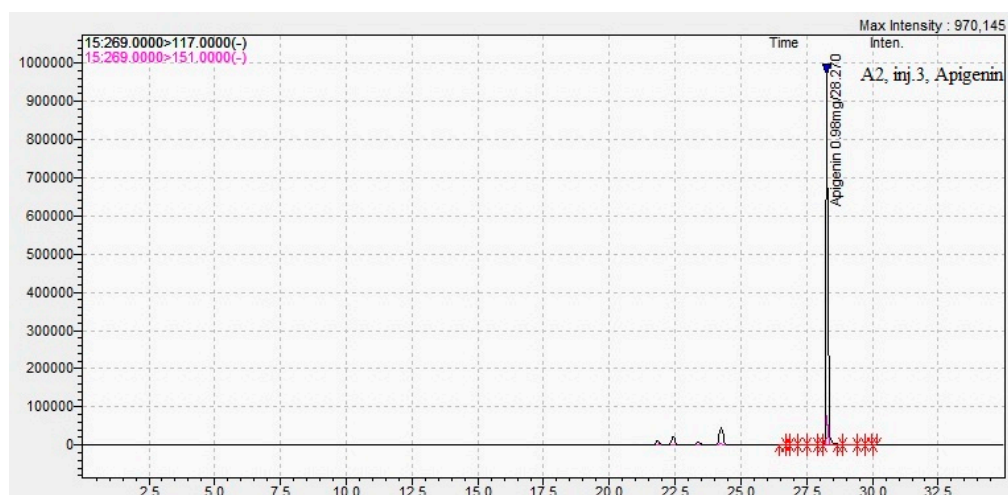

**Figure S9.** LC-MS chromatograms obtained for the identification of apigenin in the A2 sample (3 injections).

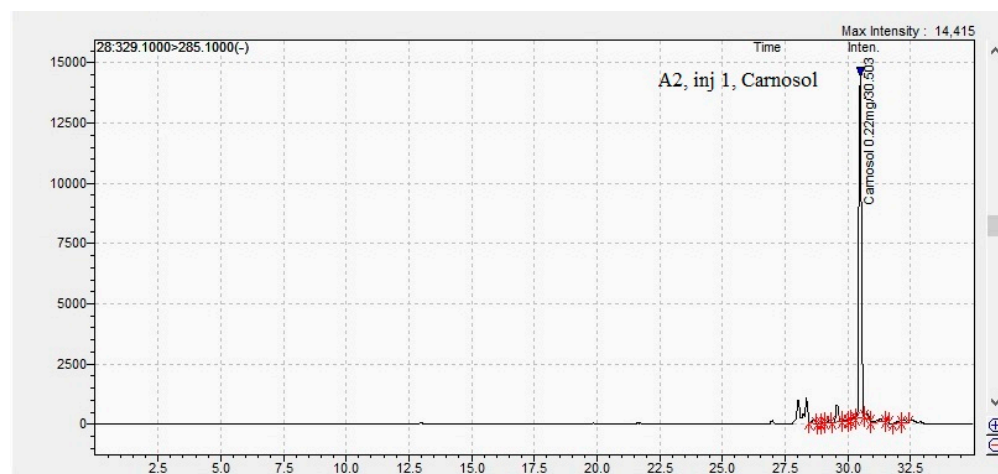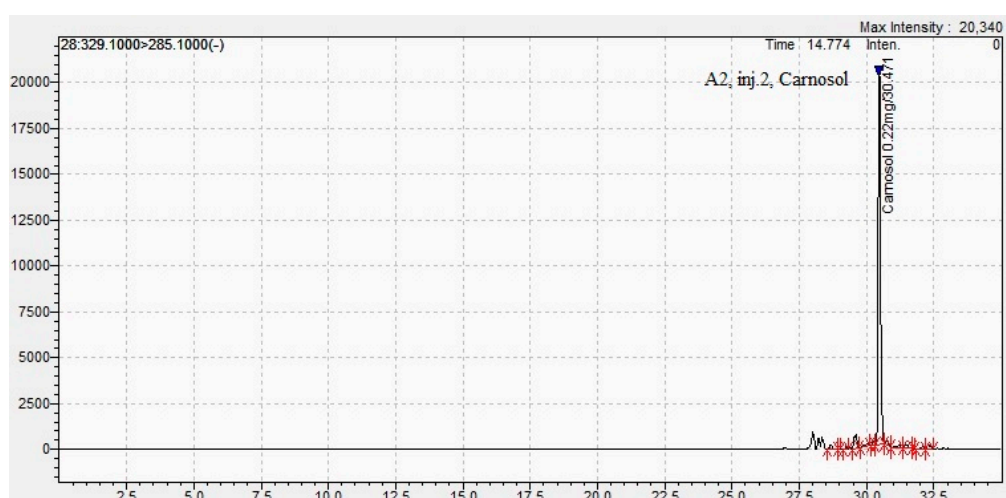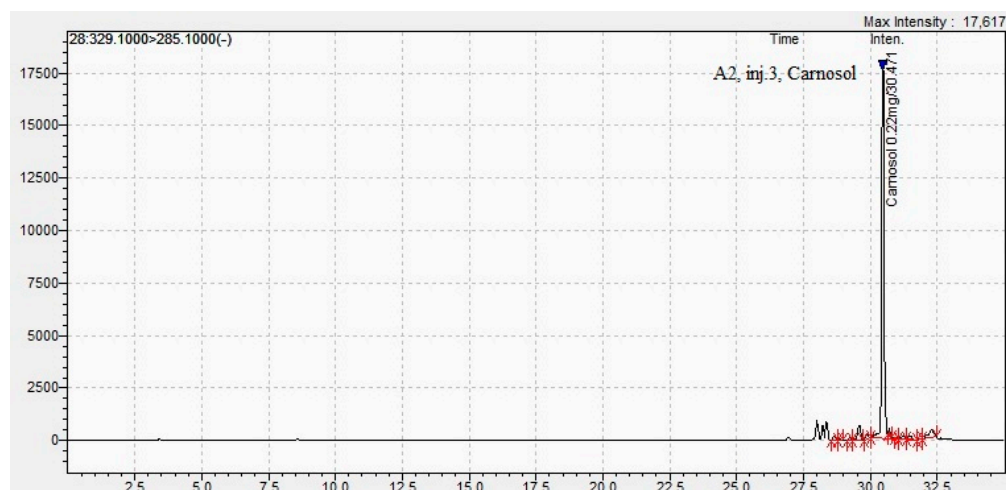

**Figure S10.** LC-MS chromatograms obtained for the identification of carnosol in the A2 sample (3 injections).

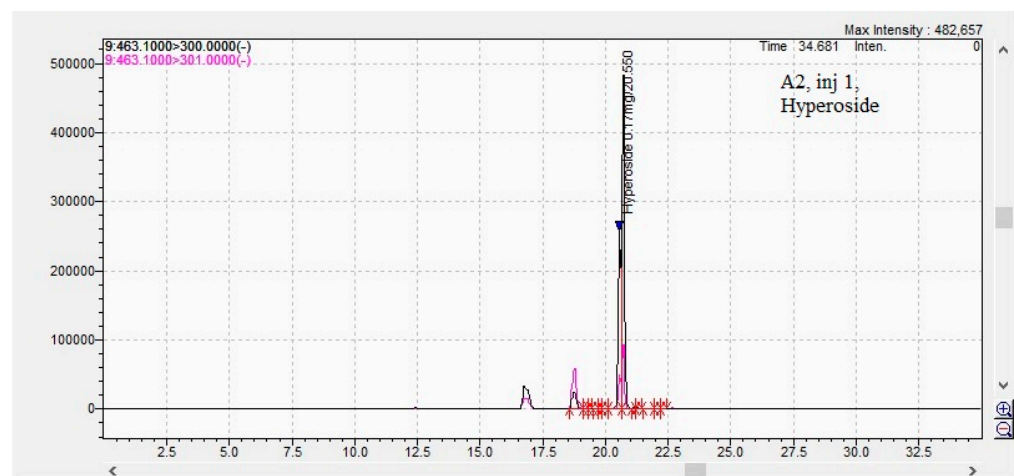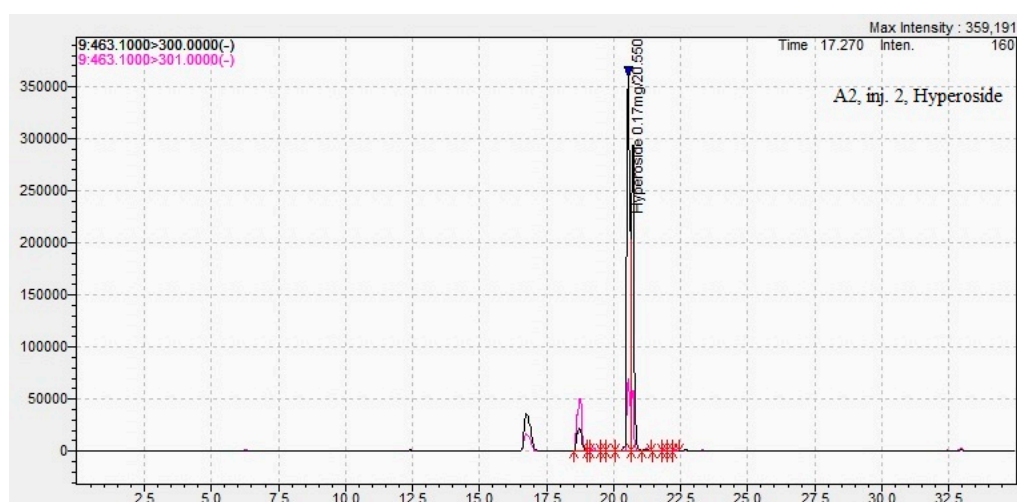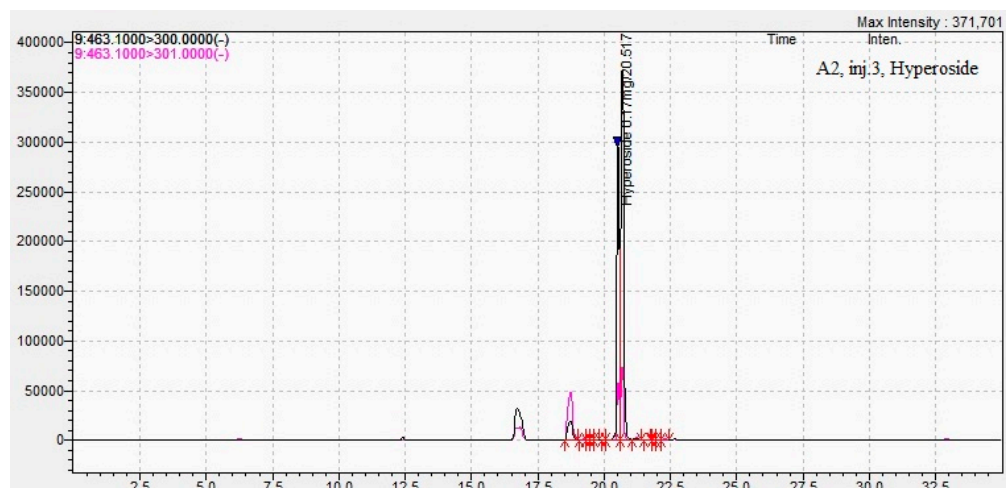

**Figure S11.** LC-MS chromatograms obtained for the identification of hyperoside in the A2 sample (3 injections).



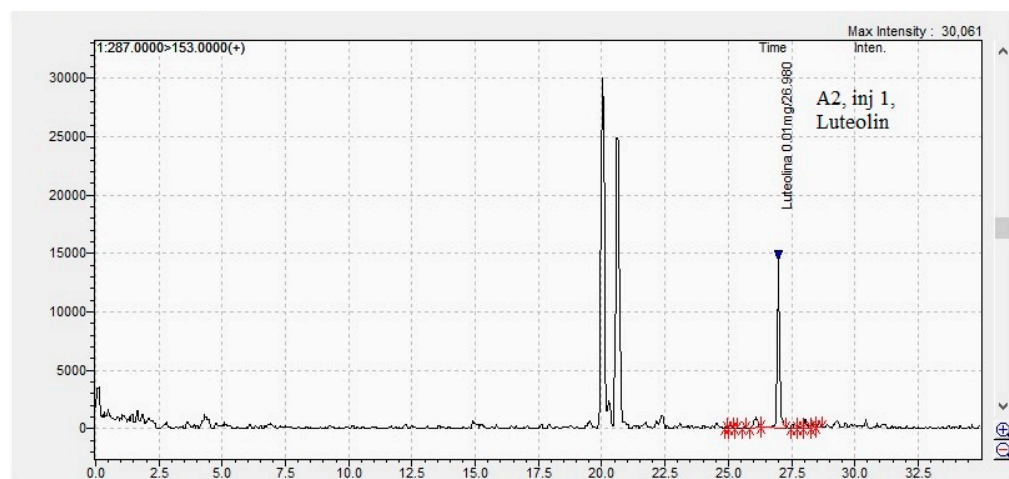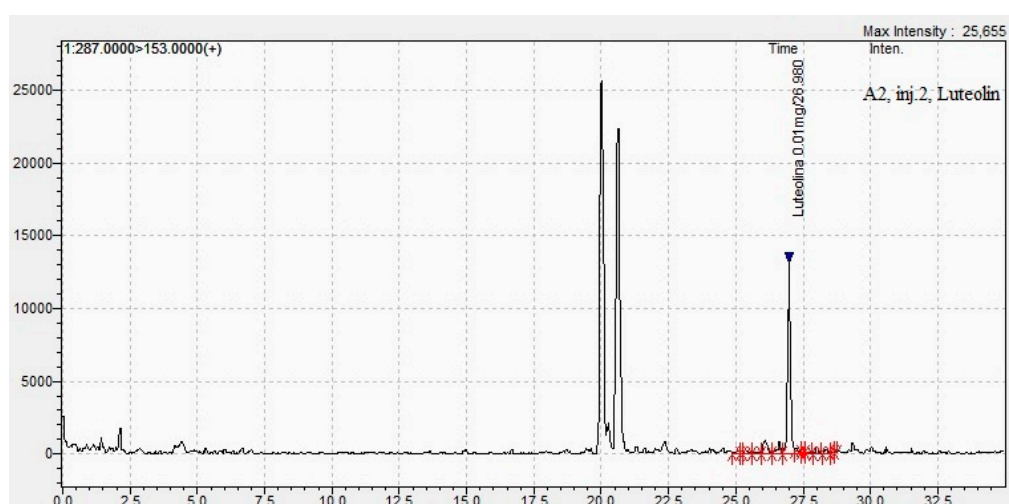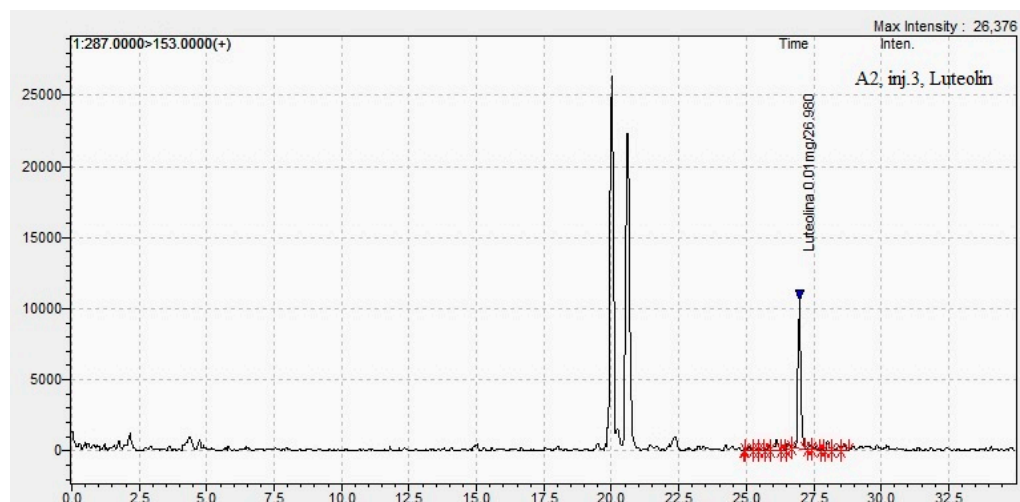

**Figure S12.** LC-MS chromatograms obtained for the identification of luteolin in the A2 sample (3 injections).



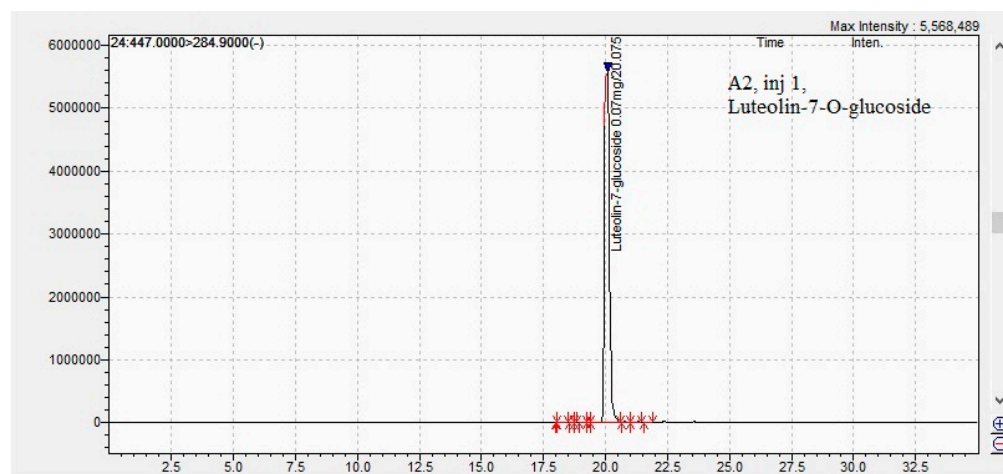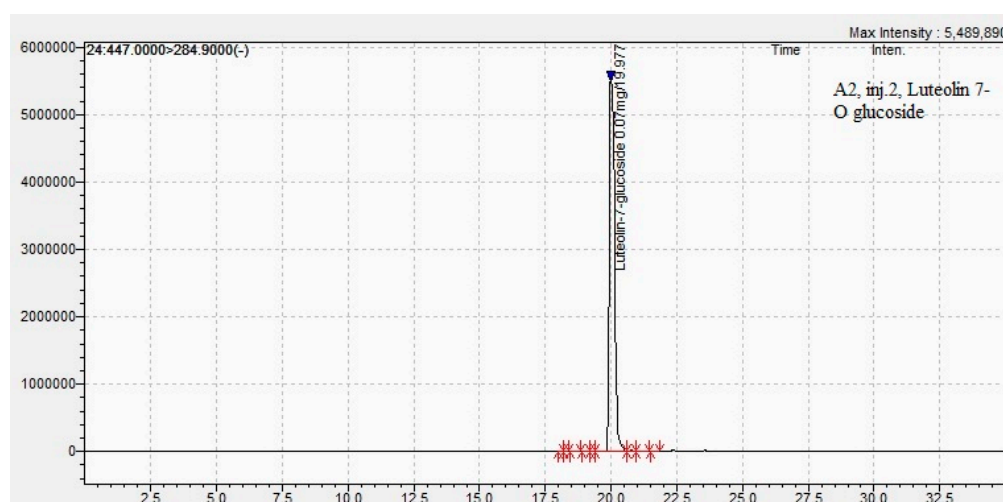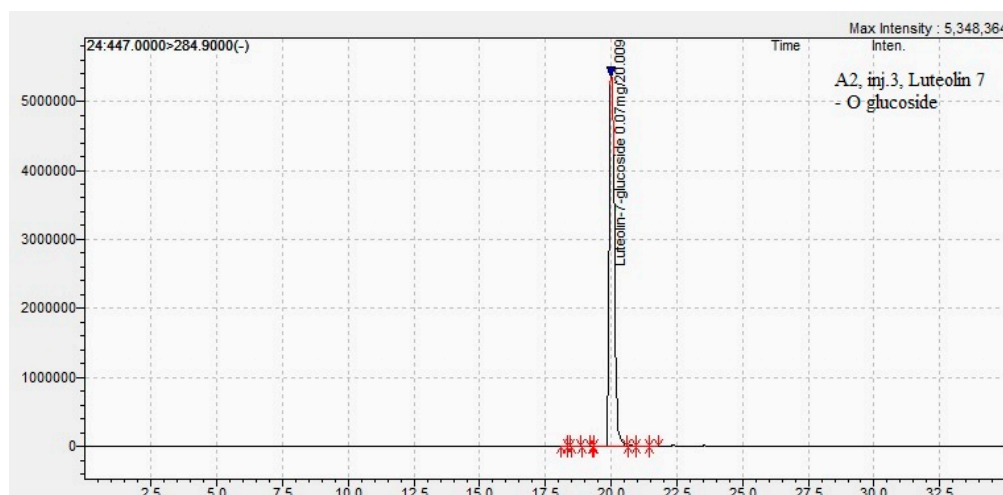

**Figure S13.** LC-MS chromatograms obtained for the identification of luteolin-7-O-glucoside in the A2 sample (3 injections).

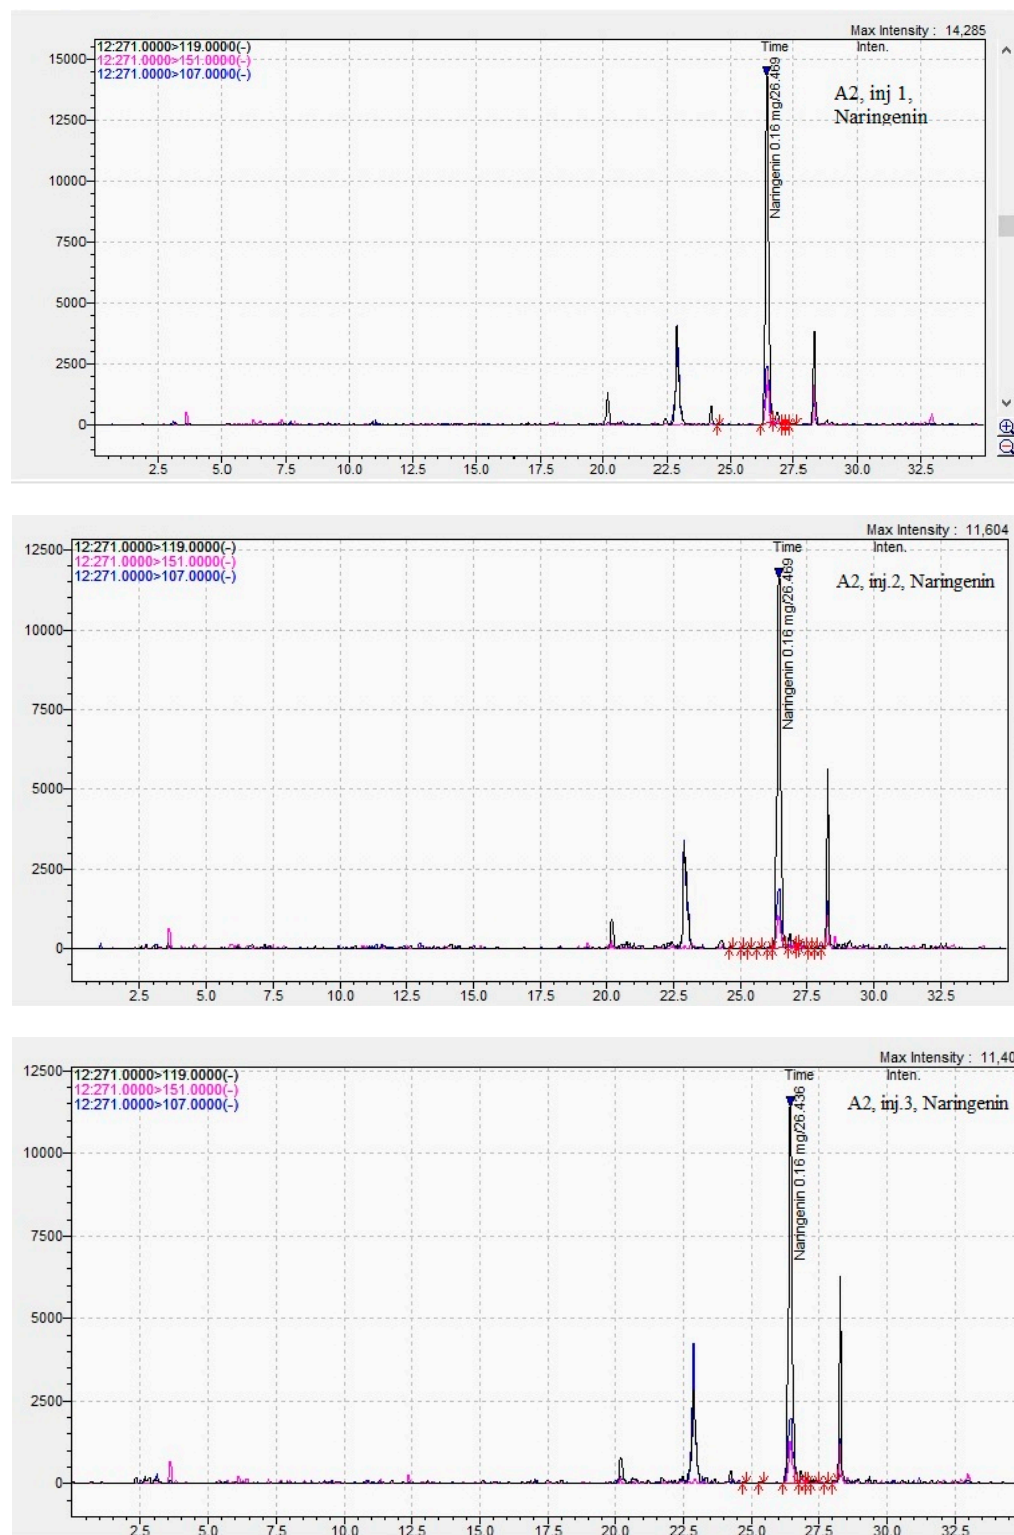

**Figure S14.** LC-MS chromatograms obtained for the identification of naringenin in the A2 sample (3 injections).

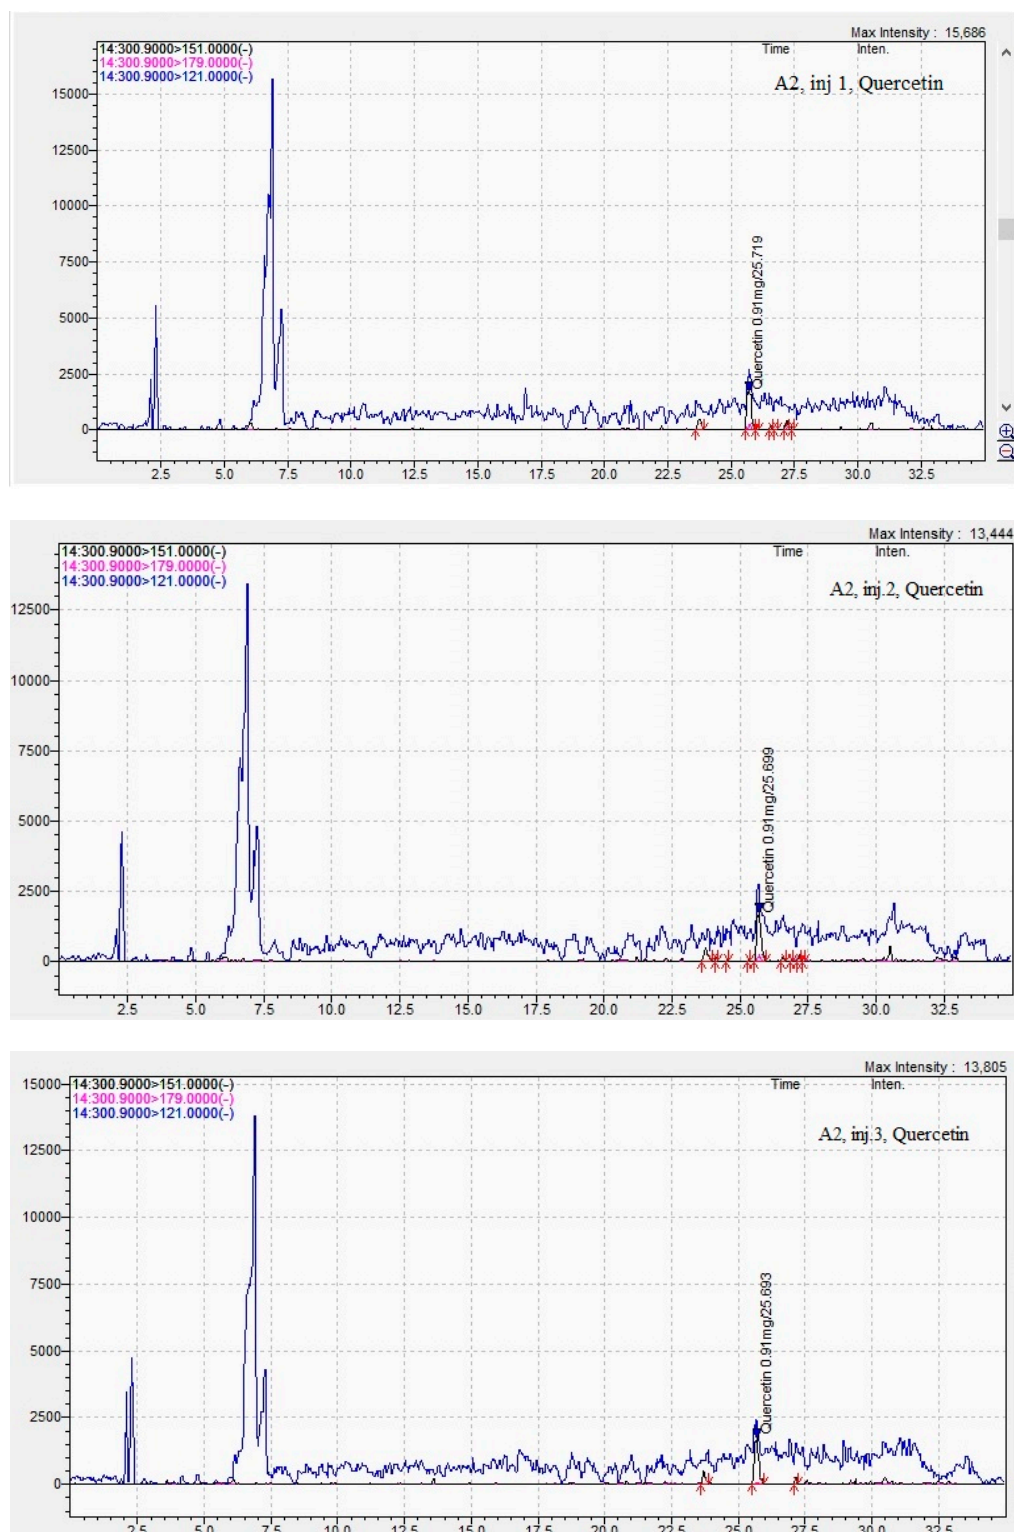

**Figure S15.** LC-MS chromatograms obtained for the identification of quercetin in the A2 sample (3 injections).

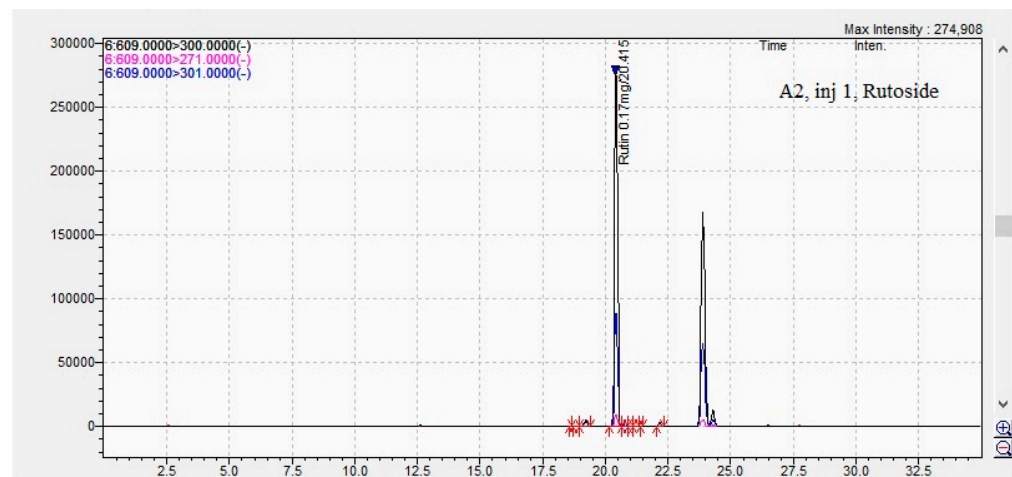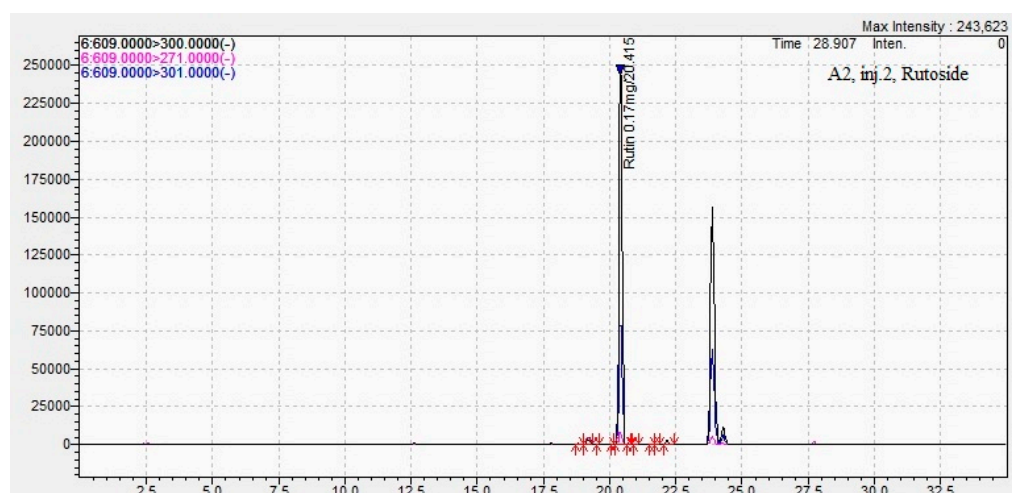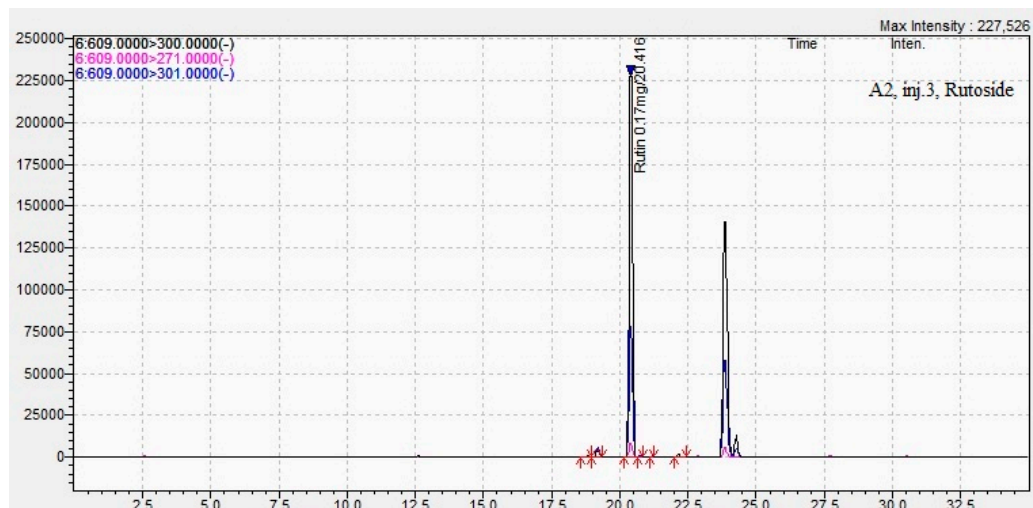

**Figure S16.** LC-MS chromatograms obtained for the identification of rutoside in the A2 sample (3 injections).



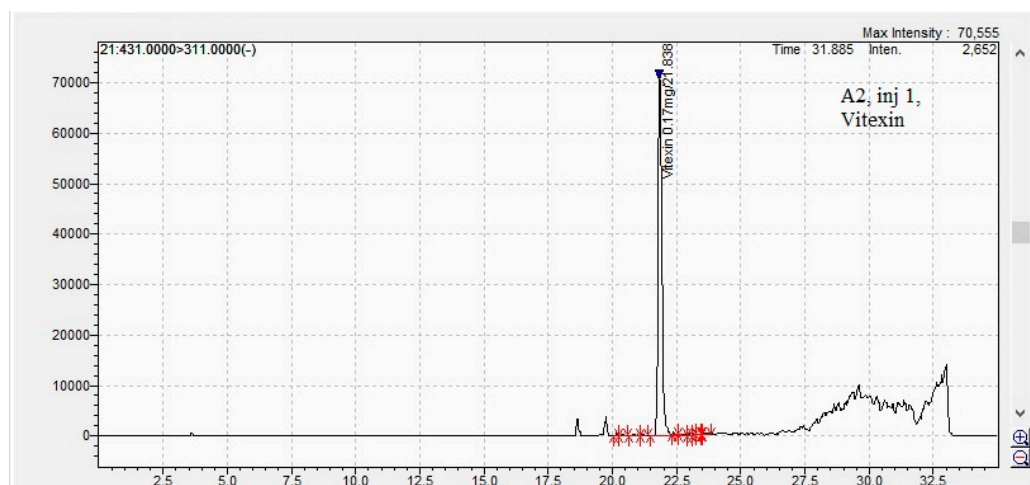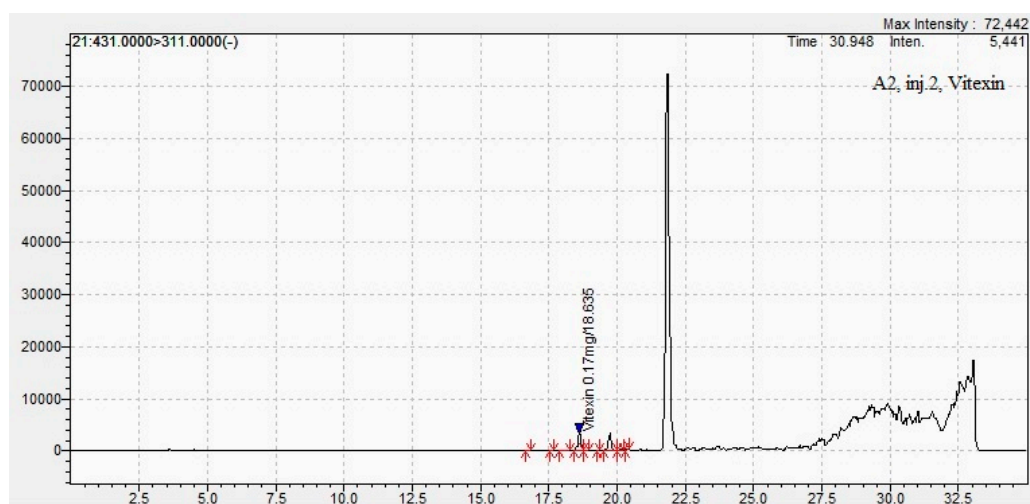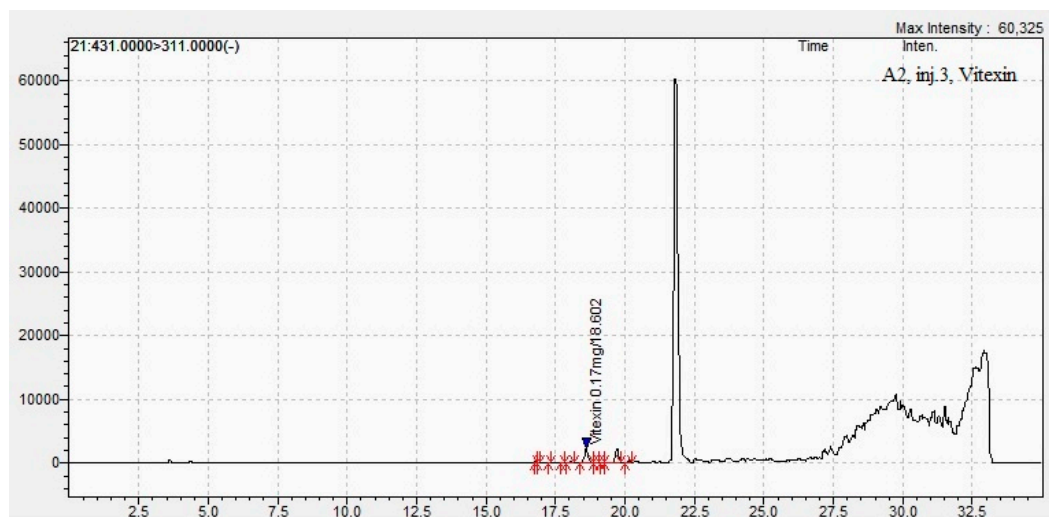

**Figure S17.** LC-MS chromatograms obtained for the identification of vitexin in the A2 sample (3 injections).



| A2 | A      | Acontrol | I        | I%       | Conc (µg/mL) |
|----|--------|----------|----------|----------|--------------|
| 1  | 0,916  | 0,9719   | 0,057516 | 5,751621 | 6,25         |
| 2  | 0,813  |          | 0,163494 | 16,34942 | 12,5         |
| 3  | 0,7352 |          | 0,243544 | 24,35436 | 18,75        |
| 4  | 0,6314 |          | 0,350345 | 35,03447 | 25           |
| 5  | 0,5465 |          | 0,437699 | 43,76994 | 31,25        |
| 6  | 0,4557 |          | 0,531125 | 53,11246 | 37,5         |
| 7  | 0,3679 |          | 0,621463 | 62,14631 | 43,75        |
| 8  | 0,2804 |          | 0,711493 | 71,1493  | 50           |

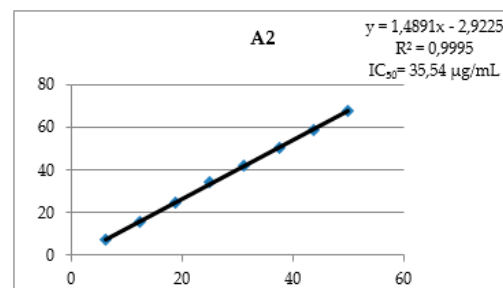

**Figure S18.** Determination of IC<sub>50</sub> for the A2 sample. Note: I % = (A control – A sample/A control) × 100 where A control is the absorbance of the control, composed of the DPPH• radical solution + methanol (mixture containing all reagents except the sample) and A sample is the absorbance of DPPH radical + sample. The DPPH radical scavenging activity of the sample was expressed as IC<sub>50</sub> (µg/mL), that is the concentration required to cause a 50% DPPH inhibition.

| B2 | A      | Acontrol | I        | I%       | Conc (µg/mL) |
|----|--------|----------|----------|----------|--------------|
| 1  | 1,1161 | 1,1659   | 0,042714 | 4,271378 | 6,25         |
| 2  | 0,9737 |          | 0,164851 | 16,48512 | 12,5         |
| 3  | 0,8729 |          | 0,251308 | 25,1308  | 18,75        |
| 4  | 0,7782 |          | 0,332533 | 33,25328 | 25           |
| 5  | 0,6667 |          | 0,428167 | 42,81671 | 31,25        |
| 6  | 0,5549 |          | 0,524059 | 52,40587 | 37,5         |
| 7  | 0,4253 |          | 0,635217 | 63,52174 | 43,75        |
| 8  | 0,3374 |          | 0,71061  | 71,06098 | 50           |

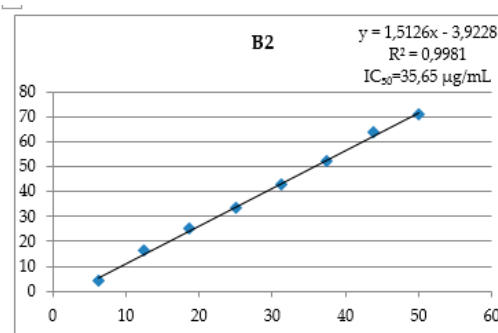

**Figure S19.** Determination of IC<sub>50</sub> for the B2 sample. Note: I % = (A control – A sample/A control) × 100 where A control is the absorbance of the control, composed of the DPPH• radical solution + methanol (mixture containing all reagents except the sample) and A sample is the absorbance of DPPH radical + sample. The DPPH radical scavenging activity of the sample was expressed as IC<sub>50</sub> (µg/mL), that is the concentration required to cause a 50% DPPH inhibition.

| A1 | A      | Acontrol | I        | I%       | Conc (µg/mL) |
|----|--------|----------|----------|----------|--------------|
| 1  | 0,9857 | 1,5524   | 0,365048 | 36,50477 | 12,5         |
| 2  | 0,9045 |          | 0,417354 | 41,73538 | 25           |
| 3  | 0,8345 |          | 0,462445 | 46,24452 | 37,5         |
| 4  | 0,7246 |          | 0,533239 | 53,32389 | 50           |
| 5  | 0,5742 |          | 0,630121 | 63,01211 | 62,5         |
| 6  | 0,4826 |          | 0,689127 | 68,91265 | 75           |
| 7  | 0,4012 |          | 0,741561 | 74,15615 | 87,5         |
| 8  | 0,3321 |          | 0,786073 | 78,60732 | 100          |

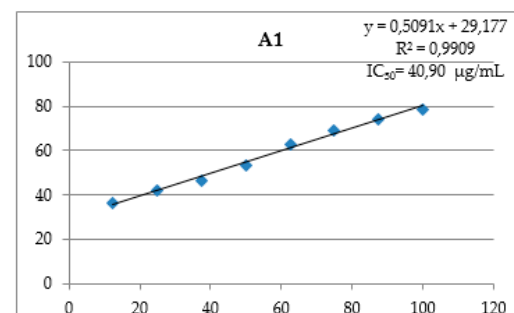

**Figure S20.** Determination of IC<sub>50</sub> for the A1 sample. Note: I % = (A control – A sample/A control) × 100 where A control is the absorbance of the control, composed of the DPPH• radical solution + methanol (mixture containing all reagents except the sample) and A sample is the absorbance of DPPH radical + sample. The DPPH radical scavenging activity of the sample was expressed as IC<sub>50</sub> (µg/mL), that is the concentration required to cause a 50% DPPH inhibition.

| Ascorbic acid | A      | Acontrol | I        | I%       | Conc (µg/mL) |
|---------------|--------|----------|----------|----------|--------------|
| 1             | 1,2733 | 1,3793   | 0,076851 | 7,685058 | 1,25         |
| 2             | 1,0846 |          | 0,213659 | 21,36591 | 2,5          |
| 3             | 0,9212 |          | 0,332125 | 33,2125  | 3,75         |
| 4             | 0,7812 |          | 0,433626 | 43,36258 | 5            |
| 5             | 0,6262 |          | 0,546002 | 54,60016 | 6,25         |
| 6             | 0,4488 |          | 0,674618 | 67,46176 | 7,5          |
| 7             | 0,305  |          | 0,778873 | 77,88733 | 8,75         |
| 8             | 0,1443 |          | 0,895382 | 89,53817 | 10           |

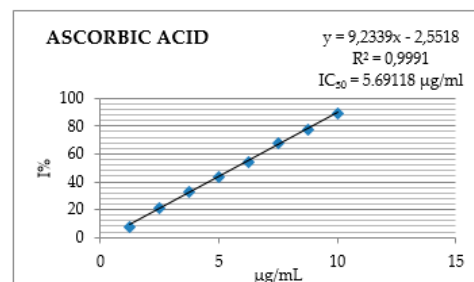

**Figure S21.** Determination of  $IC_{50}$  for the ascorbic acid. Note:  $I\% = (A_{\text{control}} - A_{\text{sample}}/A_{\text{control}}) \times 100$  where  $A_{\text{control}}$  is the absorbance of the control, composed of the DPPH• radical solution + methanol (mixture containing all reagents except the sample) and  $A_{\text{sample}}$  is the absorbance of DPPH radical + sample. The DPPH radical scavenging activity of the sample was expressed as  $IC_{50}$  ( $\mu\text{g/mL}$ ), that is the concentration required to cause a 50% DPPH inhibition.

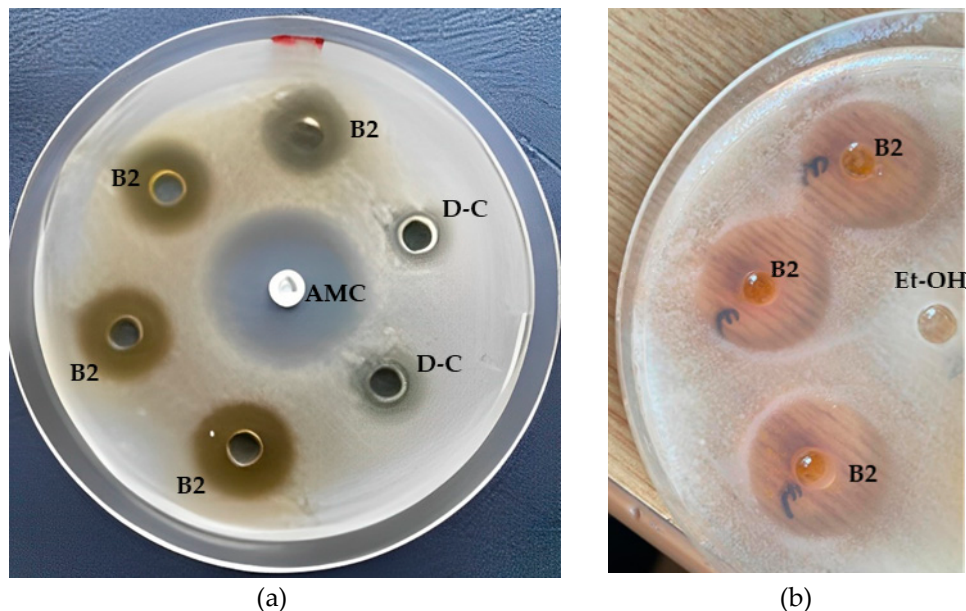

**Figure S22.** *In vitro* antibacterial activity of the *D. moldavica* sample B2 by well diffusion method against reference strains: (a) *Staphylococcus aureus* ATCC 25923, (b) *Escherichia coli* ATCC 25922; positive (AMC, amoxicillin-clavulanic acid) and negative (70% Et-OH) control center placed; D-C (*D. moldavica* commercial product, data not included).

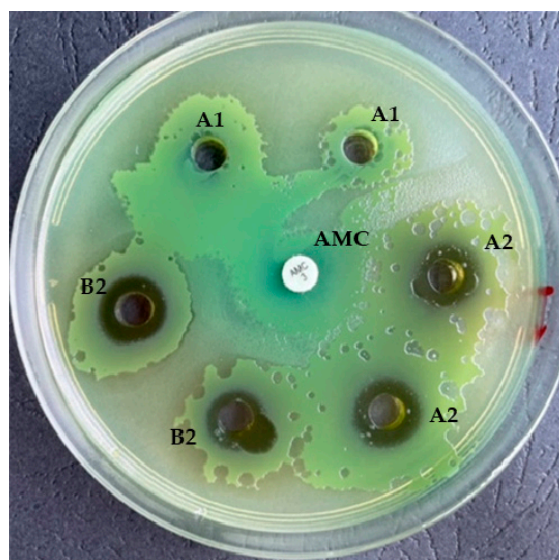

**Figure S23.** *In vitro* antibacterial activity of the *D. moldavica* samples (A1, A2, B2) as well as of the positive control (AMC, amoxicillin-clavulanic acid, center placed) by well diffusion method against *Pseudomonas aeruginosa* ATCC 27853, no inhibitory effect towards the reference strain.
